# Supplementary material for: Wound Coating Collagen-Based Composites with Ag Nanoparticles: Synthesis, Structure and Biological Activity
Source: MDPI journal article supplement (doi:10.3390/coatings13081315), 2023-07-27
Supplement: s1 [file s1]

# Wound coatings collagen-based composite with Ag nanoparticles: synthesis, structure and biological activity

Alexander Vasil'kov, Natalya Tseomashko, Anastasia Tretyakova, Aziza Abidova, Ivan Butenko, Alexander Pereyaslavtsev, Natalya Arkharova, Vladimir Volkov, Eleonora Shtykova

## Supporting Information

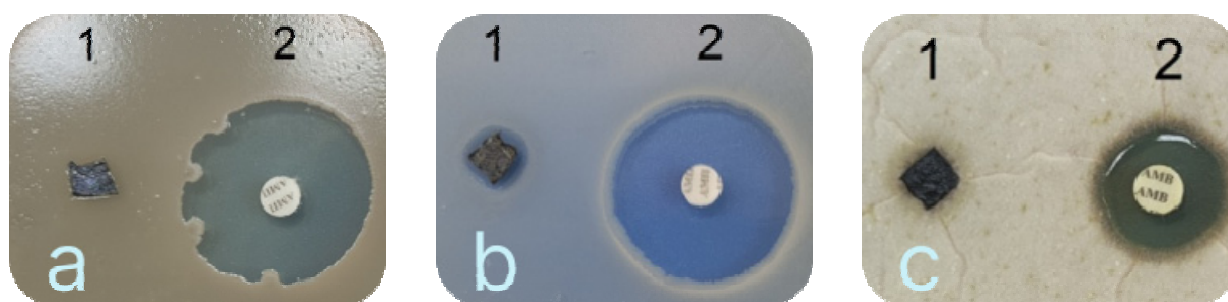

**Figure S1.** Antimicrobial activity of nanocomposite Col/Ag NPs.

a: *B. subtilis*, 1 — Col/Ag NPs, 2 — ampicillin;

b: *E. coli*, 1 — Col/Ag NPs, 2 — ampicillin;

c: *A. niger*, 1 — Col/Ag NPs, 2 — amphotericin B.

**Table S1.** Parameters of components in the photoelectron spectra of the collagen and its nanocomposite with silver nanoparticles:  $E_b$  – binding energy,  $W$  – peak width and  $I_{rel}$  – relative intensity

| Spectra | Col        |          |               | Col/Ag NPs |          |               | Group                          |
|---------|------------|----------|---------------|------------|----------|---------------|--------------------------------|
|         | $E_b$ , eV | $W$ , eV | $I_{rel}$ , % | $E_b$ , eV | $W$ , eV | $I_{rel}$ , % |                                |
| C 1s    | 285.00     | 1.65     | 57.98         | 285.00     | 1.54     | 61.21         | C-C/C-H                        |
|         | 286.27     | 1.65     | 24.17         | 286.38     | 1.54     | 14.78         | C-NH/C-O-C/C-OH                |
|         | 287.97     | 1.65     | 14.12         | -          | -        | -             | O=C-N                          |
|         | 289.12     | 1.65     | 3.73          | -          | -        | -             | O=C-OH                         |
|         | -          | -        | -             | 285.94     | 1.54     | 7.96          | C-NH                           |
|         | -          | -        | -             | 287.93     | 1.54     | 11.59         | C=O/O-C-O                      |
|         | -          | -        | -             | 288.99     | 1.54     | 4.46          | C-O-C*=O                       |
| O 1s    | 531.56     | 1.99     | 67.91         | 531.22     | 1.57     | 57.03         | O=C-N                          |
|         | 532.70     | 1.99     | 21.63         | -          | -        | -             | O=C-O                          |
|         | 533.76     | 1.99     | 10.46         | -          | -        | -             | C-O-C                          |
|         | -          | -        | -             | 532.15     | 1.57     | 8.72          | C-O-C=O*                       |
|         | -          | -        | -             | 533.15     | 1.57     | 8.73          | C-O*-C=O                       |
|         | -          | -        | -             | 532.17     | 1.57     | 25.52         | C=O/O-C-O                      |
| N 1s    | 400.15     | 1.46     | 68.55         | 400.67     | 1.56     | 13.27         | O=C-N                          |
|         | 399.28     | 1.46     | 20.91         | 399.83     | 1.56     | 86.73         | C-NH <sub>2</sub>              |
|         | 401.30     | 1.46     | 10.54         | -          | -        | -             | C-NH <sub>3</sub> <sup>+</sup> |
